# Supplementary material for: Interactions of Mycotoxin Alternariol with Cyclodextrins and Its Removal from Aqueous Solution by Beta-Cyclodextrin Bead Polymer
Source: MDPI journal article supplement (doi:10.3390/biom9090428), 2019-08-30
Supplement: s1 [file s1]

## SUPPLEMENTARY MATERIALS

Article

# Interactions of Mycotoxin Alternariol with Cyclodextrins and its Removal from Aqueous Solution by Beta-Cyclodextrin Bead Polymer

Eszter Fliszár-Nyúl <sup>1,2</sup>, Beáta Lemli <sup>2,3</sup>, Sándor Kunsági-Máté <sup>2,3</sup>, Lajos Szente <sup>4</sup>, and Miklós Poór <sup>1,2,\*</sup>

<sup>1</sup> Department of Pharmacology, Faculty of Pharmacy, University of Pécs, H-7642 Pécs, Hungary

<sup>2</sup> János Szentágothai Research Centre, University of Pécs, H-7642 Pécs, Hungary

<sup>3</sup> Institute of Organic and Medicinal Chemistry, Medical School, University of Pécs, H-7624 Pécs, Hungary

<sup>4</sup> Cyclolab Cyclodextrin Research & Development Laboratory, Ltd., H-1097 Budapest, Hungary

\* Correspondence: poor.miklos@pte.hu (M.P.)

Received: 31 July 2019; Accepted: 27 August 2019; Published: date

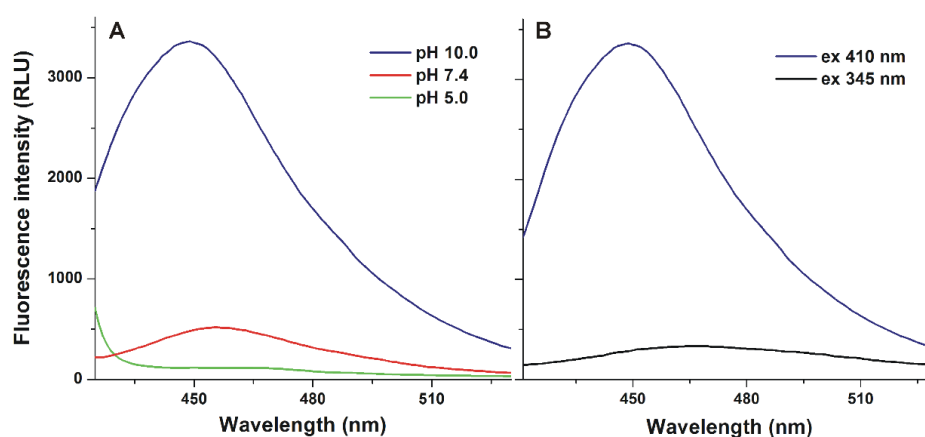

**Figure S1.** Emission spectra of AOH using 410 nm excitation wavelength. Fluorescence emission (A:  $\lambda_{\text{ex}} = 410 \text{ nm}$ ) spectra of AOH (50  $\mu\text{M}$ ) in in sodium acetate (50 mM, pH 5.0), sodium phosphate (50 mM, pH 7.4), and sodium borate (50 mM, pH 10.0) buffers. Fluorescence emission spectra of AOH (50  $\mu\text{M}$ ) in sodium borate buffer (50 mM, pH 10.0) using 345 (black line) and 410 nm (blue line) excitation wavelengths (B) (ex slit: 5 nm, em slit: 10 nm; RLU, relative light unit).

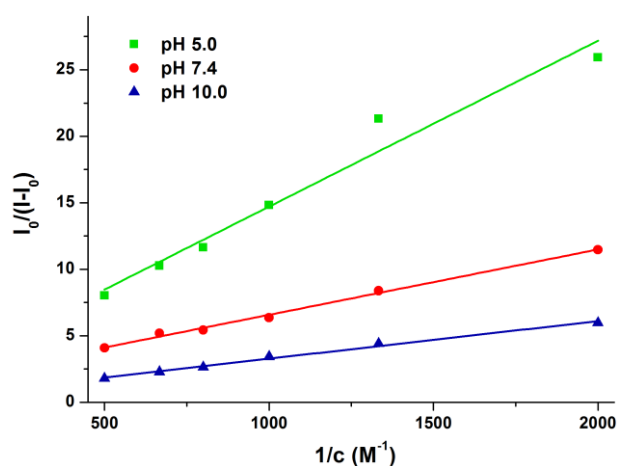

**Figure S2.** Investigation of AOH-BCD complex formation based on the Benesi-Hildebrand equation (Equation 1). Benesi-Hildebrand plots ( $R^2 = 0.96\text{--}0.99$ ) of AOH-BCD complexes in sodium acetate (50 mM, pH 5.0), sodium phosphate (50 mM, pH 7.4), and sodium borate (50 mM, pH 10.0) buffers ( $\lambda_{\text{ex}} = 345 \text{ nm}$ ,  $\lambda_{\text{ex}} = 460 \text{ nm}$ ).

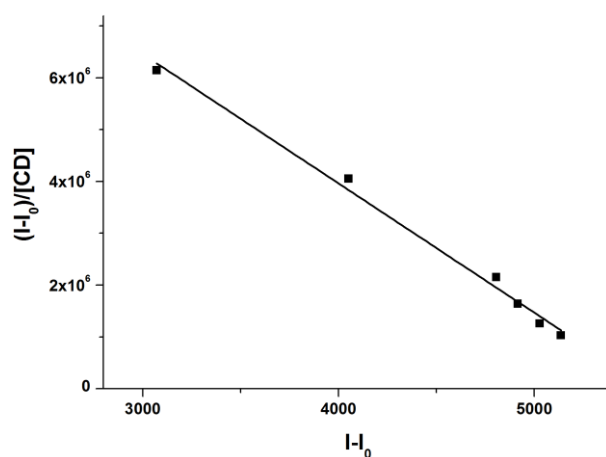

**Figure S3.** Investigation of AOH-GCD complex formation based on the Scatchard equation (Equation 2). Scatchard plot ( $R^2 = 0.99$ ) of AOH-GCD complex in sodium phosphate (50 mM, pH 7.4) buffer ( $\lambda_{\text{ex}} = 345 \text{ nm}$ ,  $\lambda_{\text{ex}} = 460 \text{ nm}$ ; AOH: 5  $\mu\text{M}$ ; GCD: 0.0, 0.5, 1.0, 2.0, 3.0, 4.0, and 5.0 mM).

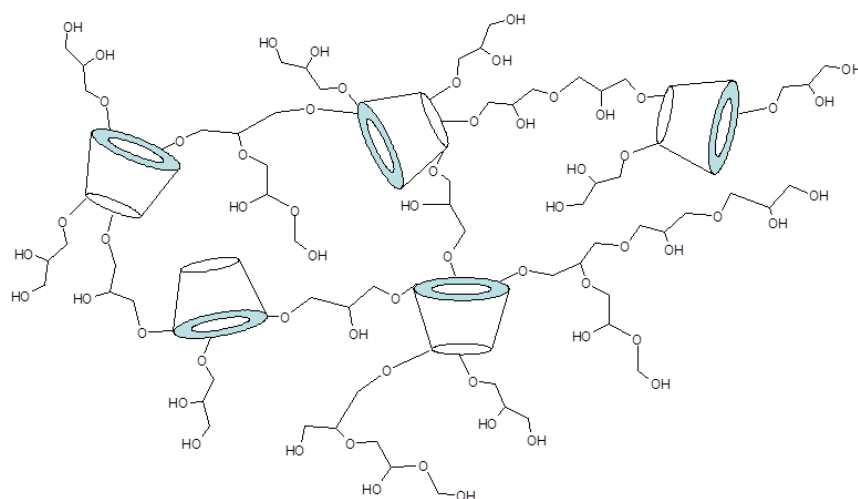

**Figure S4.** Schematic representation of the chemical structure of epichlorohydrin cross-linked BCD polymer.
